# Supplementary material for: Pospiviroid Infection of Tomato Regulates the Expression of Genes Involved in Flower and Fruit Development
Source: MDPI journal article supplement (doi:10.3390/v10100516), 2018-09-21
Supplement: s1 [file s1]

Aviña-Padilla *et al.*

Supplementary Table S2. List of network components shown in Supplementary Figure S2.

Input Genes:

| Abbreviation      | Gene ID        | GO:Description/Function                                                                                                                                                                                                                                                                                                                                                                   | Protein Size |
|-------------------|----------------|-------------------------------------------------------------------------------------------------------------------------------------------------------------------------------------------------------------------------------------------------------------------------------------------------------------------------------------------------------------------------------------------|--------------|
| APETALA 1/MADS-MC | Solyc05g056620 | MADS-box transcription factor MADS-MC                                                                                                                                                                                                                                                                                                                                                     | (244 aa)     |
| ARF6b             | Solyc00g196060 | Auxin response factor 6                                                                                                                                                                                                                                                                                                                                                                   | (354 aa)     |
| ARF8a             | Solyc02g037530 | Auxin response factor 8; Auxin response factors (ARFs) are transcriptional factors that binds specifically to the DNA sequence 5'-TGTCTC-3' found in the auxin-responsive promoter elements (AuxREs)                                                                                                                                                                                      | (842 aa)     |
| DWF-1             | Solyc02g030170 | DWARF1/DIMINUTO Plays a critical role in the general process of plant cell elongation. Involved in the synthesis of campesterol, an early precursor of brassinolide. Regulate indirectly phytochrome-mediated light responses through the modulation of brassinosteroid biosynthesis                                                                                                      | (568 aa)     |
| Fad7              | Solyc06g051400 | Omega-3 fatty acid desaturase                                                                                                                                                                                                                                                                                                                                                             | (435 aa)     |
| Fw2.2             | Solyc02g090730 | ORFX Fw2.2; ORFX Fruit Weight                                                                                                                                                                                                                                                                                                                                                             | (163 aa)     |
| GAI               | Solyc11g011260 | DELLA protein GAI; Probable transcriptional regulator that acts as a repressor of the gibberellin (GA) signaling pathway. Probably acts by participating in large multiprotein complexes that repress transcription of GA- inducible genes. Upon GA application, it is degraded by the proteasome, allowing the GA signaling pathway. Its degradation is not essential for germination    | (588 aa)     |
| GA20ox1/3OH-1     | Solyc06g066820 | 3b-hydroxylase. Converts the inactive gibbberellin precursors GA9 and GA20 in the bioactives gibberellins GA4 and GA1.                                                                                                                                                                                                                                                                    | (374 aa)     |
| GA7ox             | Solyc06g069900 | 1-aminocyclopropane-1-carboxylate oxidase.– gibberellin 20-oxidase activity, gibberellin 2-beta-dioxygenase activity                                                                                                                                                                                                                                                                      | (314 aa)     |
| GIB1              | Solyc08g006770 | Anthocyanidin synthase oxoglutarate and iron dependent oxygenase                                                                                                                                                                                                                                                                                                                          | (351 aa)     |
| PKv               | Solyc12g017390 | Viroid symptom modulation protein. Serine/threonine protein kinase                                                                                                                                                                                                                                                                                                                        | (467 aa)     |
| SIAG6             | Solyc01g093960 | MADS box transcription factor                                                                                                                                                                                                                                                                                                                                                             | (252 aa)     |
| SIIAA3            | Solyc09g065850 | IAA3; Aux/IAA proteins are short-lived transcriptional factors that function as repressors of early auxin response genes at low auxin concentrations                                                                                                                                                                                                                                      | (185 aa)     |
| SIIAA9/ctd1       | Solyc04g076850 | IAA16; Aux/IAA proteins are short-lived transcriptional factors that function as repressors of early auxin response genes at low auxin concentrations                                                                                                                                                                                                                                     | (251 aa)     |
| SIGRAS24          | Solyc01g090950 | GRAS family transcription factor (AHRD V1 ***- B9GPD0_POPTR); contains Interpro domain(s) IPR005202 GRAS transcription factor                                                                                                                                                                                                                                                             | (102 aa)     |
| SIWUS             | Solyc02g083950 | Protein WUSCHEL; Transcription factor that plays a central role during developmental processes such as early embryogenesis and flowering, probably by regulating expression of specific genes. Required to specify stem cell identity in meristems, such as shoot apical meristem (SAM). May induce shoot stem cells activity in order to maintain the stem cell identity (By similarity) | (272 aa)     |
| SIOVA6            | Solyc01g096870 | Prolyl-tRNA synthetase. Protein Binding. Glutamate t-RNA ligase activity.                                                                                                                                                                                                                                                                                                                 | (547 aa)     |
| SlBigPetal1       | Solyc05g006650 | SlbHLH036. BHLH Transcription factor, similar to BigPetal1 in Arabidopsis. Sequence-specific DNA binding transcription factor activity                                                                                                                                                                                                                                                    | (272 aa)     |
| TAG1              | Solyc02g071730 | Floral homeotic protein AGAMOUS; Probable transcription factor involved in regulating genes that determines stamen and carpel development in wild-type flowers                                                                                                                                                                                                                            | (248 aa)     |
| YABBY1            | Solyc11g071810 | Fasciated, FAS protein. Transcription factor, The fasciated (fas) gene encodes a YABBY-like transcription factor whose downregulation during flower development causes high locule number, extreme large fruit size, in tomato fruit. The mutation is caused due to a 6 - 8 kb insertion in the first intron of the locus.                                                                | (177 aa)     |

Functional Partners:

|               |                |                                                                                                                                                                  |          |
|---------------|----------------|------------------------------------------------------------------------------------------------------------------------------------------------------------------|----------|
| 20ox-1        | Solyc03g006880 | Gibberellin 20-oxidase-1, Catalyzes the oxidation of GA53 and GA19 to GA44 GA20 and GA19, precursors of the GA1 (active form). AF049898                          | (378 aa) |
| 20ox-3        | Solyc11g072310 | AF049900, Gibberellin 20-oxidase-3. Catalyzes the oxidation of GA53 and GA19 to GA44 GA20 and GA19, precursors of the GA1 (active form).                         | (379 aa) |
| 3BH-isomerase | Solyc06g082980 | 3-beta-hydroxysteroid-Delta8 Delta7-isomerase (AHRD V1 ***- C3KH60_ANOFI); contains Interpro domain(s) IPR007905 Emopamil-binding. C-8 sterol isomerase activity | (221aa)  |
| ADP R Factor  | Solyc07g006640 | ADP-ribosylation factor 3 (AHRD V1 ***- B4FM64_MAIZE); contains Interpro domain(s) IPR006688 ADP-ribosylation factor. GTP binding, intracellular                 | (182aa)  |
| asr           | Solyc02g080640 | Adenylyl-sulfate reductase asr                                                                                                                                   | (461 aa) |
| CLV2          | Solyc04g056640 | Leucine rich repeat receptor like protein CLAVATA2                                                                                                               | (746 aa) |

|                                 |                |                                                                                                                                                                                                                                                                                                                                                |          |
|---------------------------------|----------------|------------------------------------------------------------------------------------------------------------------------------------------------------------------------------------------------------------------------------------------------------------------------------------------------------------------------------------------------|----------|
| Coi1                            | Solyc05g052620 | Coronatine-insensitive 1                                                                                                                                                                                                                                                                                                                       | (603 aa) |
| CRY1                            | Solyc04g074180 | Cryptochrome 1                                                                                                                                                                                                                                                                                                                                 | (679 aa) |
| CRY2                            | Solyc09g090100 | Cryptochrome 2                                                                                                                                                                                                                                                                                                                                 | (635 aa) |
| CYP51                           | Solyc01g008110 | Obtusifoliol 14alpha-demethylase                                                                                                                                                                                                                                                                                                               | CYP51    |
| Cyt C                           | Solyc01g103220 | Cytochrome c; Electron carrier protein. The oxidized form of the cytochrome c heme group can accept an electron from the heme group of the cytochrome c1 subunit of cytochrome reductase. Cytochrome c then transfers this electron to the cytochrome oxidase complex, the final protein carrier in the mitochondrial electron-transport chain | (112aa)  |
| DMI1                            | Solyc10g044890 | DMI1 protein (Fragment) (AHRD V1 *-*- A9DNI2_MEDTR); contains Interpro domain(s) IPR016040 NAD(P)-binding domain. Metabolic process                                                                                                                                                                                                            | (799aa)  |
| FALSIFLORA                      | Solyc03g118160 | FLORICAULA/LEAFY-like protein                                                                                                                                                                                                                                                                                                                  | (429 aa) |
| FK                              | Solyc09g009040 | Delta14-sterol reductase                                                                                                                                                                                                                                                                                                                       | (369 aa) |
| FRK1                            | Solyc03g006860 | Fructokinase                                                                                                                                                                                                                                                                                                                                   | (347 aa) |
| FRK2                            | Solyc06g073190 | Fructokinase-2; May play an important role in maintaining the flux of carbon towards starch formation                                                                                                                                                                                                                                          | (328 aa) |
| FRK3                            | Solyc02g091490 | Fructokinase 3. Fructokinase activity                                                                                                                                                                                                                                                                                                          | (389 aa) |
| G2BDO                           | Solyc04g008670 | Oxoglutarate and iron-dependent oxygenase                                                                                                                                                                                                                                                                                                      | (357 aa) |
| G2BDO7                          | Solyc02g080120 | Gibberellin 2-beta-dioxygenase 7 Oxoglutarate and iron-dependent oxygenase                                                                                                                                                                                                                                                                     | (380 aa) |
| GA2ox1                          | Solyc05g053340 | Gibberellin 2-oxidase                                                                                                                                                                                                                                                                                                                          | (349 aa) |
| GA2ox2                          | Solyc07g056670 | Gibberellin 2-oxidase 2                                                                                                                                                                                                                                                                                                                        | (322 aa) |
| GA2ox3                          | Solyc01g079200 | Gibberellin 2-oxidase                                                                                                                                                                                                                                                                                                                          | (344 aa) |
| GA2ox4                          | Solyc01g093980 | Gibberellin 20-oxidase 4                                                                                                                                                                                                                                                                                                                       | (364 aa) |
| GA2ox5                          | Solyc07g061720 | Gibberellin 2-oxidase                                                                                                                                                                                                                                                                                                                          | (331 aa) |
| GDH                             | Solyc03g094010 | Glutamate dehydrogenase (AHRD V1 **** Q94IA5_BRANA); contains Interpro domain(s) IPR014362 Glutamate dehydrogenase glutamate dehydrogenase [NAD(P)+] activity                                                                                                                                                                                  | (411 aa) |
| GDH1                            | Solyc06g033860 | Glutamate dehydrogenase (AHRD V1 **** Q94IA5_BRANA); contains Interpro domain(s) IPR014362 Glutamate dehydrogenase glutamate dehydrogenase [NAD(P)+] activity                                                                                                                                                                                  | (411 aa) |
| GDH2                            | Solyc01g068210 | Glutamate dehydrogenase (AHRD V1 ***- A2TQI4_9FLAO); contains Interpro domain(s) IPR006095 Glutamate/phenylalanine/leucine/valine dehydrogenase                                                                                                                                                                                                | (634 aa) |
| GID1                            | Solyc09g074270 | Putative GID1-like gibberellin receptor                                                                                                                                                                                                                                                                                                        | (345 aa) |
| Glucosidase                     | Solyc01g059980 | Glucan endo-1,3-beta-glucosidase B ; Implicated in the defense of plants against pathogens                                                                                                                                                                                                                                                     | (360 aa) |
| Glutamate synthase (Ferredoxin) | Solyc03g063560 | Glutamate synthase (Ferredoxin) (AHRD V1 ***- B8HTZ7_CYAP4); contains Interpro domain(s) IPR002932 Glutamate synthase, central-C                                                                                                                                                                                                               | (1621aa) |
| GP91                            | Solyc08g081690 | NADPH oxidase                                                                                                                                                                                                                                                                                                                                  | (963 aa) |
| GPA1                            | Solyc08g061220 | Guanine nucleotide-binding protein alpha-1 subunit ; Guanine nucleotide-binding proteins (G proteins) are involved as modulators or transducers in various transmembrane signaling systems                                                                                                                                                     | (384 aa) |
| HY5                             | Solyc08g061130 | Transcription factor that promotes photomorphogenesis in the light and positively HY5 regulates fruit pigmentation and fruit nutritional quality. Probably acts downstream of the light receptor network and directly affects transcription of light- induced genes                                                                            | (158 aa) |
| IAA9                            | Solyc01g097290 | IAA16 ; Aux/IAA proteins are short-lived transcriptional factors that function as repressors of early auxin response genes at low auxin concentrations                                                                                                                                                                                         | (251 aa) |
| J                               | Solyc11g010570 | MADS-box protein JOINTLESS; Putative transcription factor that coordinates gene expression underlying the J differentiation of the pedicel abscission zone. May also be involved in the maintenance of the inflorescence meristem state                                                                                                        | (265 aa) |
| kdsA                            | Solyc11g072690 | 3-desoxy-D-manno octulosonic acid-8-phosphate synthase                                                                                                                                                                                                                                                                                         | (290 aa) |
| Lanceolate                      | Solyc07g062680 | Lanceolate                                                                                                                                                                                                                                                                                                                                     | (400 aa) |
| LeANT                           | Solyc04g077490 | AP2-like ethylene-responsive transcription factor ANT-like                                                                                                                                                                                                                                                                                     | (652 aa) |
| Lin5                            | Solyc09g010080 | Beta-fructofuranosidase; Cell-wall invertase                                                                                                                                                                                                                                                                                                   | (584 aa) |
| MA-1                            | Solyc01g099760 | The 26S protease is involved in the ATP-dependent degradation MA-1 of ubiquitinated proteins. The regulatory (or ATPase) complex confers ATP dependency and substrate specificity to the 26S complex (By similarity) 26S protease regulatory subunit 6A homolog.                                                                               | (423 aa) |
| MAPK10                          | Solyc10g007500 | Mitogen-activated protein kinase 10                                                                                                                                                                                                                                                                                                            | (593 aa) |
| MAPK12                          | Solyc07g056350 | Mitogen-activated protein kinase 12                                                                                                                                                                                                                                                                                                            | (621 aa) |

|                                   |                |                                                                                                                                                                                                                                                                                                                                                                                                                                                                                                                                  |           |
|-----------------------------------|----------------|----------------------------------------------------------------------------------------------------------------------------------------------------------------------------------------------------------------------------------------------------------------------------------------------------------------------------------------------------------------------------------------------------------------------------------------------------------------------------------------------------------------------------------|-----------|
| MAPK16                            | Solyc12g040680 | Mitogen-activated protein kinase 16                                                                                                                                                                                                                                                                                                                                                                                                                                                                                              | (575 aa)  |
| NIA                               | Solyc11g013810 | Nitrate reductase [NADH]; Nitrate reductase is a key enzyme involved in the rst step of nitrate assimilation in plants, fungi and bacteria                                                                                                                                                                                                                                                                                                                                                                                       | (912 aa)  |
| nii2                              | Solyc10g050890 | Nitrite reductase                                                                                                                                                                                                                                                                                                                                                                                                                                                                                                                | (584 aa)  |
| Nitrate transporter               | Solyc03g094010 | Major facilitator superfamily, general substrate transporter                                                                                                                                                                                                                                                                                                                                                                                                                                                                     | (460 aa)  |
| opr3                              | Solyc07g007870 | 12-oxophytodienoate reductase 3. Specifically cleaves oleonic bonds in cyclic enones. Involved in the biosynthesis of jasmonic acid (JA) and perhaps in biosynthesis or metabolism of other oxylipin signaling opr3 molecules. It is required for the spatial and temporal regulation of JA levels during dehiscence of anthers, promoting the stomium degeneration program (By similarity). In vitro, reduces 9S,13S-12- oxophytodienoic acid (9S,13S-OPDA) and 9R,13R-OPDA to 9S,13S-OPC- 8-O and 9R,13R-OPC-8-O, respectively | (396 aa)  |
| Orotate phosphoribosyltransferase | Solyc11g068830 | Orotidine 5'-phosphate decarboxylase (Orotate phosphoribosyltransferase) (AHRD V1 **** C4QAV6_SCHMA); contains Interpro domain(s) IPR001754 Orotidine 5'-phosphate decarboxylase, core                                                                                                                                                                                                                                                                                                                                           | (477 aa)  |
| phyA                              | Solyc10g044670 | Phytochrome; Regulatory photoreceptor which exists in two forms that are reversibly interconvertible by light- phyA the Pr form that absorbs maximally in the red region of the spectrum and the Pfr form that absorbs maximally in the far-red region                                                                                                                                                                                                                                                                           | (1123 aa) |
| pnk-1                             | Solyc05g005250 | Partially similar to pantothenate kinase family protein. pantothenate kinase family protein AB211526                                                                                                                                                                                                                                                                                                                                                                                                                             | (426 aa)  |
| Protein kinase A-like             | Solyc05g005250 | protein phosphorylation. protein serine/threonine phosphatase complex. catalytic activity cAMP-dependent protein kinase complex                                                                                                                                                                                                                                                                                                                                                                                                  | (1080 aa) |
| PYD1                              | Solyc02g044040 | Dihydroorotate dehydrogenase family protein, Aldolase-type TIM barrel                                                                                                                                                                                                                                                                                                                                                                                                                                                            | (250 aa)  |
| PYD1A                             | Solyc03g097910 | Putative dehydrogenase, dihydropyrimidine dehydrogenase (NADP+) activity                                                                                                                                                                                                                                                                                                                                                                                                                                                         | (429 aa)  |
| PYRD                              | Solyc01g008290 | Dihydroorotatedehydrogenase(quinone),mitochondrial                                                                                                                                                                                                                                                                                                                                                                                                                                                                               | (457 aa)  |
| RBCOA                             | Solyc09g011080 | Ribulose-1 5-bisphosphate carboxylase/oxygenase activase 1 (AHRD V1 **** Q9AXG1_GOSHI); contains Interpro domain(s) IPR003959 ATPase, AAA-type, core                                                                                                                                                                                                                                                                                                                                                                             | (439 aa)  |
| RLPK                              | Solyc09g011060 | Clade IV lectin receptor kinase. Receptor like protein kinase (AHRD V1 **** Q39139_ARATH); contains Interpro domain(s) IPR001220 Legume lectin, beta chain. protein binding kinase activity                                                                                                                                                                                                                                                                                                                                      | (832 aa)  |
| RNA P                             | Solyc12g035870 | DNA-directed RNA polymerase subunit beta (AHRD V1 ***- D3WBK7_9AQUA); contains Interpro domain(s) IPR015712 DNA-directed RNA polymerase, subunit 2                                                                                                                                                                                                                                                                                                                                                                               | (398 aa)  |
| SlbHLH006                         | Solyc01g102300 | SlbHLH006 is part of the 159 member basic helix-loop-helix gene family that is known to play important role in physiological, developmental and metabolic processes.                                                                                                                                                                                                                                                                                                                                                             | (715 aa)  |
| SlbHLH052                         | Solyc07g043580 | SlbHLH052 is part of the 159 member basic helix-loop-helix gene family that is known to play important role in physiological, developmental and metabolic processes.                                                                                                                                                                                                                                                                                                                                                             | (495 aa)  |
| SITPL1                            | Solyc03g117360 | SITPL1 belongs to the 6 member TOPLESS gene family. These genes are involved in gene repression in several mechanisms.                                                                                                                                                                                                                                                                                                                                                                                                           | (2226 aa) |
| SITPL2                            | Solyc08g076030 | SITPL2 belongs to the 6 member TOPLESS gene family. These genes are involved in gene repression in several mechanisms. WD-40 repeat protein (AHRD V1 *--- C7RS72_ACCPU); contains Interpro domain(s) IPR017986 WD40 repeat, region. protein homodimerization activity. transcription repressor activity                                                                                                                                                                                                                          | (1135 aa) |
| SPY                               | Solyc09g010180 | Probable UDP-N-acetylglucosamine--peptide N-acetylglucosaminyltransferase SPINDLY; Probable O-linked N-acetylglucosamine transferase (OGT) involved in various processes such as gibberellin (GA) signaling pathway. spy OGTs catalyze the addition of nucleotide-activated sugars directly onto the polypeptide through O-glycosidic linkage with the hydroxyl of serine or threonine. Probably acts by adding O- linked sugars to yet unknown proteins                                                                         | (931 aa)  |
| T12                               | Solyc07g007120 | Homeobox protein knotted-1-like LET12 ; May have a role to play in formative events in ovule and embryo morphogenesis                                                                                                                                                                                                                                                                                                                                                                                                            | (431 aa)  |
| T6                                | Solyc02g081120 | Homeobox protein knotted-1-like LET6 ; May have a role to play in formative events in ovule and embryo morphogenesis. Probably binds to the DNA sequence 5'-TGAC- 3'                                                                                                                                                                                                                                                                                                                                                             | (354 aa)  |
| TM29                              | Solyc02g089200 | MADS-box protein. Transcription factor. TM29 belongs to the SEPALLATA (SEP) subfamily of the MADS-box gene family. Protein binding, sequence-specific DNA binding transcription factor activity                                                                                                                                                                                                                                                                                                                                  | (246 aa)  |
| TOMPRORNA prosystemin             | Solyc05g051750 | Activates a lipid-based signal transduction pathway in which linolenic acid is converted to jasmonic acid,a potent activator of defense gene transcription, including proteinase inhibitor                                                                                                                                                                                                                                                                                                                                       | (201 aa)  |
| TOMTRALTBE                        | Solyc01g009310 | Meloidogyne-induced giant cell protein DB217, 7-dehydrocholesterol reductase activity, delta-7 reductase activity                                                                                                                                                                                                                                                                                                                                                                                                                | (434 aa)  |
| Unk                               | Solyc10g005470 | Unknown, Uncharacterized protein                                                                                                                                                                                                                                                                                                                                                                                                                                                                                                 | (139 aa)  |
| VGT1                              | Solyc03g078000 | Vacuolar glucose transporter 1                                                                                                                                                                                                                                                                                                                                                                                                                                                                                                   | (545 aa)  |
| VIN3                              | Solyc07g018270 | Vernalization insensitive 3, Fibronectin, type III                                                                                                                                                                                                                                                                                                                                                                                                                                                                               | (739 aa)  |
| VIRP1                             | Solyc01g106280 | PSTVd RNA-biding protein, Virp1; PSTVd RNA-binding protein Virp1a; PSTVd RNA-binding protein Virp1b; PSTVd RNA-binding protein Virp1c; PSTVd RNA-binding protein Virp1d                                                                                                                                                                                                                                                                                                                                                          | (602 aa)  |
| ZWICHEL                           | Solyc02g068340 | Kinesin-like calmodulin binding protein kinesin motor region, calmodulin binding                                                                                                                                                                                                                                                                                                                                                                                                                                                 | (1265 aa) |

|                   |                |                                                                                                                                                                                                                                                                                                                                                                                           |          |
|-------------------|----------------|-------------------------------------------------------------------------------------------------------------------------------------------------------------------------------------------------------------------------------------------------------------------------------------------------------------------------------------------------------------------------------------------|----------|
| APETALA 1/MADS-MC | Solyc05g056620 | MADS-box transcription factor MADS-MC                                                                                                                                                                                                                                                                                                                                                     | (244 aa) |
| ARF6b             | Solyc00g196060 | Auxin response factor 6                                                                                                                                                                                                                                                                                                                                                                   | (354 aa) |
| ARF8a             | Solyc02g037530 | Auxin response factor 8; Auxin response factors (ARFs) are transcriptional factors that binds specifically to the DNA sequence 5'-TGTCTC-3' found in the auxin-responsive promoter elements (AuxREs)                                                                                                                                                                                      | (842 aa) |
| DWF-1             | Solyc02g030170 | DWARF1/DIMINUTO Plays a critical role in the general process of plant cell elongation. Involved in the synthesis of campesterol, an early precursor of brassinolide. Regulate indirectly phytochrome-mediated light responses through the modulation of brassinosteroid biosynthesis                                                                                                      | (568 aa) |
| Fad7              | Solyc06g051400 | Omega-3 fatty acid desaturase                                                                                                                                                                                                                                                                                                                                                             | (435 aa) |
| Fw2.2             | Solyc02g090730 | ORFX Fw2.2; ORFX Fruit Weight                                                                                                                                                                                                                                                                                                                                                             | (163 aa) |
| GAI               | Solyc11g011260 | DELLA protein GAI; Probable transcriptional regulator that acts as a repressor of the gibberellin (GA) signaling pathway. Probably acts by participating in large multiprotein complexes that repress transcription of GA- inducible genes. Upon GA application, it is degraded by the proteasome, allowing the GA signaling pathway. Its degradation is not essential for germination    | (588 aa) |
| GA20ox1/3OH-1     | Solyc06g066820 | 3b-hydroxylase. Converts the inactive gibberellin precursors GA9 and GA20 in the bioactives gibberellins GA4 and GA1.                                                                                                                                                                                                                                                                     | (374 aa) |
| GA7ox             | Solyc06g069900 | 1-aminocyclopropane-1-carboxylate oxidase.– gibberellin 20-oxidase activity, gibberellin 2-beta-dioxygenase activity                                                                                                                                                                                                                                                                      | (314 aa) |
| GIB1              | Solyc08g006770 | Anthocyanidin synthase oxoglutarate and iron dependent oxygenase                                                                                                                                                                                                                                                                                                                          | (351 aa) |
| PKv               | Solyc12g017390 | Viroid symptom modulation protein. Serine/threonine protein kinase                                                                                                                                                                                                                                                                                                                        | (467 aa) |
| SIAG6             | Solyc01g093960 | MADS box transcription factor                                                                                                                                                                                                                                                                                                                                                             | (252 aa) |
| SIIAA3            | Solyc09g065850 | IAA3; Aux/IAA proteins are short-lived transcriptional factors that function as repressors of early auxin response genes at low auxin concentrations                                                                                                                                                                                                                                      | (185 aa) |
| SIIAA9/ctd1       | Solyc04g076850 | IAA16; Aux/IAA proteins are short-lived transcriptional factors that function as repressors of early auxin response genes at low auxin concentrations                                                                                                                                                                                                                                     | (251 aa) |
| SIGRAS24          | Solyc01g090950 | GRAS family transcription factor (AHRD V1 **-- B9GPD0_POPT); contains Interpro domain(s) IPR005202 GRAS transcription factor                                                                                                                                                                                                                                                              | (102 aa) |
| SIWUS             | Solyc02g083950 | Protein WUSCHEL; Transcription factor that plays a central role during developmental processes such as early embryogenesis and flowering, probably by regulating expression of specific genes. Required to specify stem cell identity in meristems, such as shoot apical meristem (SAM). May induce shoot stem cells activity in order to maintain the stem cell identity (By similarity) | (272 aa) |
| SIOVA6            | Solyc01g096870 | Prolyl-tRNA synthetase. Protein Binding. Glutamate t-RNA ligase activity.                                                                                                                                                                                                                                                                                                                 | (547 aa) |
| SIBigPetal1       | Solyc05g006650 | SlbHLH036. BHLH Transcription factor, similar to BigPetal1 in Arabidopsis. Sequence-specific DNA binding transcription factor activity                                                                                                                                                                                                                                                    | (272 aa) |
| TAG1              | Solyc02g071730 | Floral homeotic protein AGAMOUS; Probable transcription factor involved in regulating genes that determines stamen and carpel development in wild-type flowers                                                                                                                                                                                                                            | (248 aa) |
| YABBY1            | Solyc11g071810 | Fasciated, FAS protein. Transcription factor, The fasciated (fas) gene encodes a YABBY-like transcription factor whose downregulation during flower development causes high locule number, extreme large fruit size, in tomato fruit. The mutation is caused due to a 6 - 8 kb insertion in the first intron of the locus.                                                                | (177 aa) |
