# Supplementary material for: Pospiviroid Infection of Tomato Regulates the Expression of Genes Involved in Flower and Fruit Development
Source: MDPI journal article supplement (doi:10.3390/v10100516), 2018-09-21
Supplement: s1 [file s1]

**Table 1S. Oligonucleotide primer sets used in RT-PCR, real-time and stem-loop RT-PCR analyses.**

| Gene                                                                  | Oligonucleotide                                  | Sequence (5'–3')                                  | Gene, Accession No, or Gene Locus Identity                         | Reference <sup>a</sup>         |
|-----------------------------------------------------------------------|--------------------------------------------------|---------------------------------------------------|--------------------------------------------------------------------|--------------------------------|
| Pospiviroid                                                           | POSPI-FW/POSPI-RE                                | GGGATCCCCGGGGAAAC/<br>AGCTTCAGTTGTWTCCACCGGGT     |                                                                    | Verhoeven <i>et al.</i> , 2004 |
| bHLH TF ( <i>BIGPETAL1</i> homolog)                                   | BHLH tomato_F/<br>BHLH tomato_R                  | GCAGCAAACATTCGAGACAA/<br>GCCTTTGATGCCTCCAATTA     | <i>SIBIGPETAL1</i> ;<br>Tomato_SGNlocusID_20267_Solyc04g005130     | this paper                     |
| Proline-like t-RNA synthetase (OVA6) ( <i>OVULEABORTION6</i> homolog) | Ovule Abortion tomato_F/ Ovule Abortion tomato_R | ATTGTCGGCGTTTTAGTTGG/<br>GCTGCTTGATGGCAGTTACA     | <i>SIOVA6</i> ; Tomato_SGNlocusID_12237_Solyc01g096870             | this paper                     |
| <i>EF-1α</i>                                                          | EF1-F / EF1 R                                    | GATTGGTGGTATTGGAAGTCTC/<br>GCTTCGTGGTGCATCTC      | <i>S. lycopersicum</i> elongation factor 1 ( <i>EF-1</i> ); X14449 | Hammond and Zhao, 2009         |
| <i>expansin</i>                                                       | EXPF/EXPR                                        | TGTTGGAGGTGCTGGTGATA/<br>CCCCTCAAAAGTTTGTCCA      | <i>LeEXP2</i> ; AF096776                                           | Hammond and Zhao, 2009         |
| <i>pkv</i> (protein kinase viroid induced)                            | PKVRQF/PKVRQR                                    | TCCGTTGTTCTGTCAATCCA/<br>CCTCCCACAAAAGACCAAA      | <i>pkv</i> ; EU196240                                              | Hammond and Zhao, 2009         |
| <i>GA20ox1</i>                                                        | GA20oxRQF/GA20ox RQR                             | TTCCGGTTCCACTTATCGAC/<br>GGCGTTGGAGATGATATTA      | <i>GA20oxidase1</i> ; AB032198                                     | Hammond and Zhao, 2009         |
| <i>GA7ox</i>                                                          | GA7OXF/GA7OXR                                    | TTTGAGCACTTGTGGTTTCG/TGCTTG<br>AAATAAGGTGTAATGCTG | <i>GA7 oxidase</i>                                                 | Katsarou <i>et al.</i> , 2016  |
| <i>SIIAA3</i>                                                         | SIIAA3F/SIIAA3R                                  | GTTAGCATGGATGGAGCACCA/ACCAA<br>CAAGCATCCAATCAAC   | Tomato AUX/IAA transcription factor; JN379433                      | this paper                     |
| <i>IAA9</i>                                                           | R-IAASoIF/<br>R-IAASoIF                          | GCTGTGAATGATGCCTCAAA/<br>TCAAATAGGGAGCACCATCC     | AUX/IAA9 transcriptional regulator; AJ937282                       | this paper                     |
| <i>ARF6A</i>                                                          | ARF6ASoIF/<br>ARF6ASoIR                          | TTTCATGAACCGGAACCAT/TAAT/<br>CAAAATTGCCAACGCGTGTG | Auxin responsive factor 6A <i>Solyc00g196060</i>                   | Liu <i>et al.</i> , 2016       |
| <i>ARF8B</i>                                                          | ARF8BSoIF/<br>ARF8BSoIR                          | GGGAAAGGAAGAGGCTGAAT/<br>CGAAAGCTAAAGAAGCCAGGT    | Auxin responsive factor 8B <i>Solyc02g037530</i>                   | Liu <i>et al.</i> , 2016       |

|                        |                             |                                                                                  |                                                                                       |                                        |
|------------------------|-----------------------------|----------------------------------------------------------------------------------|---------------------------------------------------------------------------------------|----------------------------------------|
| <i>SIAG6</i>           | SIAGL6F/SIAGL6R             | AAACCCTTGAGAGGTACCAACG/<br>CACCAAGCAAGTGCCTTTGAG                                 | <i>Solanum AGAMOUS</i> -like 6 MADS-box-transcription<br>factor <i>Solyc01g093960</i> | Klap <i>et al.</i> , 2017              |
| <i>SIGRAS24</i>        | qSIGRAS24F/<br>qSIGRASR     | TGGTCCAGACAGGGAATCCG/<br>TTCAAGTTGTTGGTGTGGCA                                    | Transcription factor; <i>Solyc01g090950.2</i> ; SGN_U569651                           | Huang <i>et al.</i> , 2017             |
| <i>SIDELLA</i>         | qSIDELLAF/<br>qSIDELLAR     | TGATGCGACTATACTTGATATAAG/<br>GGGTTAATCTGTTTAATAGAGTTC                            | <i>Solyc11g011260.1</i> ; SGN_U575114                                                 | Huang <i>et al.</i> , 2017             |
| <i>Dwarf1-DIMINUTO</i> | Dwarf1-DIMF/<br>Dwarf1-DIMR | TCCAAGATGTCGGATGCTAA/<br>GATCCATCGGAACGAAAGAA                                    | Protein involved in steroid synthesis <i>Solyc02g030170</i>                           | Katsarou <i>et al.</i> , 2016          |
| <i>SIWUS</i>           | SIWUSF/SIWUSR               | CCAGCAACTTACCCTTTTCTTG/TAAA<br>GCAGAGTTACCCCTTTGG                                | <i>WUSCHEL</i> ; <i>Solyc02g083950</i>                                                | Li <i>et al.</i> , 2017b               |
| <i>YABBY</i>           | YABBYF/YABBYR               | GTAAGATGTGGGCATTGTGC/TGTACT<br>GTTGCCTTTGCAGC                                    | Zinc-finger domain protein; <i>Solyc11g071810</i>                                     | Li <i>et al.</i> , 2017b               |
| <i>FW2.2</i>           | FW2.2F/FW2.2R               | GCTTAAGAACCGTGGCTTTG/TGATAA<br>GGGGGCATGGTAAC                                    | <i>FRUIT WEIGHT 2.2</i> , <i>Solyc02g090730</i>                                       | Li <i>et al.</i> , 2017b               |
| <i>APETALA1</i>        | ApetalaF/ApetalaR           | TGCGATGCTGAAGTTGCTTT/GTTTTT<br>CTGCACCGGTGATT                                    | Sol Apetala-like MADS box transcription factor;<br>AY306154                           | this paper                             |
| <i>TAG1</i>            | TAG1F/TAG1R                 | CTTGATGCCAGGGAGTTCAT/<br>ATCGAATTGCTGAGGTGGAG                                    | Tomato agamous-like transcription factor;<br><i>Solyc02g071730</i>                    | Li <i>et al.</i> , 2017b               |
| miR156                 | RT primer/Forward<br>primer | GTCGTATCCAGTGCAGGGTCCGAGGT<br>ATTCGCACTGGATACGACGTGCTC/GC<br>GGCGGTGACAGAAGAGAGT |                                                                                       | Varkonyi-Gasic <i>et al.</i> ,<br>2010 |
| miR159                 | RT primer/Forward<br>primer | GTCGTATCCAGTGCAGGGTCCGAGGT<br>ATTCGCACTGGATACGACTAGAGC/C<br>GGCGGTTTGGATTGAAGGGA |                                                                                       | Varkonyi-Gasic <i>et al.</i> ,<br>2010 |
| miR167                 | RT primer/Forward<br>primer | GTCGTATCCAGTGCAGGGTCCGAGGT<br>ATTCGCACTGGATACGACCTAGATC/T<br>CGCGTGAAGCTGCCAGCAT |                                                                                       | Varkonyi-Gasic <i>et al.</i> ,<br>2010 |
| miR171                 | RT primer/Forward<br>primer | GTCGTATCCAGTGCAGGGTCCGAGGT<br>ATTCGCACTGGATACGACGATATT/TT<br>CCTTGATTGAGCCGCGCC  |                                                                                       | Varkonyi-Gasic <i>et al.</i> ,<br>2010 |
| miR396                 | RT primer/Forward<br>primer | GTCGTATCCAGTGCAGGGTCCGAGGT<br>ATTCGCACTGGATACGACCAGTTC/CG<br>GCGTTCCACAGCTTTCTT  |                                                                                       | Varkonyi-Gasic <i>et al.</i> ,<br>2010 |
| miR408                 | RT primer/Forward<br>primer | GTCGTATCCAGTGCAGGGTCCGAGGT<br>ATTCGCACTGGATACGACGCCAGG/C<br>GGCGCATGCACTGCCTCTTC |                                                                                       | Varkonyi-Gasic <i>et al.</i> ,<br>2010 |

|                                |                                |                                                   |                      |                                     |
|--------------------------------|--------------------------------|---------------------------------------------------|----------------------|-------------------------------------|
| Universal miRNA reverse primer | Universal miRNA reverse primer | GTGCAGGGTCCGAGGT                                  |                      | Varkonyi-Gasic <i>et al.</i> , 2010 |
| U6snRNA                        | U6snRNAF/<br>U6snRNAR          | TCTAACAGTGTAGTTTGTCCCTTCG/T<br>TGTGCGTGTCATCCTTGC | U6 small nuclear RNA | Feng <i>et al.</i> , 2013.          |

<sup>a</sup> Feng, J., Lin, R., and Chen, J. (2013). *Mol. Biol. Rep.* 40, 3713-3722; Hammond, R.W., and Zhao, Y. (2009) *BMC Plant Biol* 9,108; Huang, W., Peng, S., Xian, Z., Lin, D., Hu, G., Yang, L., Ren, M., and Li, Z. (2017) *Plant Biotech. J.* 15, 472-488; Katsarou, K., Wu, Y., Zhang, R., Bonar, N., Morris, J., Hedley, P. E., Bryan, G. J., Kalantidis, K., and Hornyik, C. (2016) *PLoS One* 3:11(3): e0150711; Klap, C., Yeshayahou, E., Bolger, A. M., Arazi, T., Gupta, S. K., Shabtai, S., Usabel, B., Salts, Y., and Barg, R. (2017) *Plant Biotech. J.* 15, 634-647; Li, H., Qi, M., Sun, M., Liu, Y., Liu, Y., Xu, T., Li, Y., and Li, T. (2017b) *Front. Plant Sci.* 8: 457; Liu, X., Xu, T., Dong, X., Liu, Y., Liu, Z., Shi, Z., Wang, Y., Qi, M., and Li, T. (2016) *Acta Physiol. Plant* 38:77; Varkonyi-Gasic, E., Wu, R., Wood, M., Walton, E. F., and Hellens, R. P. (2007) *Plant Meth.* 3, 12; Verhoeven, J., Jansen, C., Willemen, T.M., Kox, L.F.F., Owens, R.A., and Roenhorst, J.W. (2004) *Eur. J. Plant Pathol.* 110, 823-831.
