# Supplementary material for: Pospiviroid Infection of Tomato Regulates the Expression of Genes Involved in Flower and Fruit Development
Source: MDPI journal article supplement (doi:10.3390/v10100516), 2018-09-21

Aviña-Padilla et al.  
Supplementary Figure 1.

Rod-like secondary structures of tomato planta macho viroid (TPMVd; GenBank K00817) and the OG1 strain of Mexican papita viroid (MPVd; GenBank L78454) predicted using the UNAFold Web Server (<http://unafold.rna.albany.edu/?q=mfold> ; Zuker, M. *Nucleic Acids Res.* **2003**; 31 (13), 3406-3415.). The thermodynamically most stable structures are shown. The putative functional domains are indicated (Keese, P.; Symons, R. H. **1985**. *Proc. Natl. Acad. Sci. USA.* 82, 4582-4586). T<sub>L</sub>= terminal left; T<sub>R</sub> = terminal right. The nucleotide differences between MPV-OG1 and TPMVd are highlighted in red. T<sub>L</sub>= terminal left; T<sub>R</sub> = terminal right. The T<sub>R</sub> domain containing a single base pair (<sub>174</sub>G:C<sub>183</sub> ; shown in blue) determining virulence in TPMVd is boxed (Li, R.; Padmanabhan, C.; Ling, K-S. **2017**. *Virology* 500, 238-246.)

TPMVd ΔG=-152.20

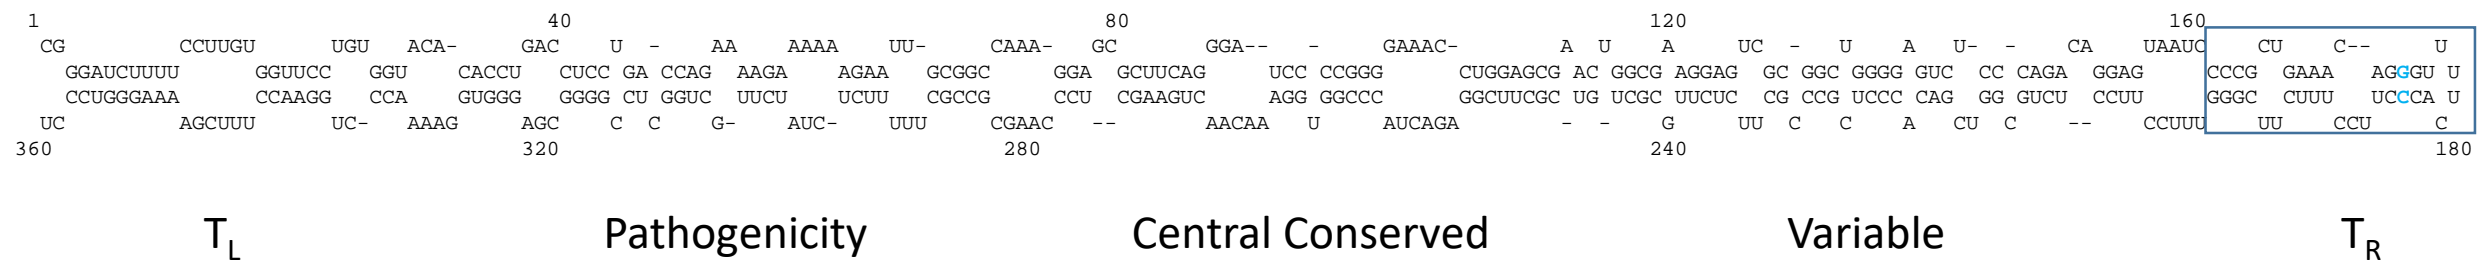

MPVd-OG1 ΔG=-160.20

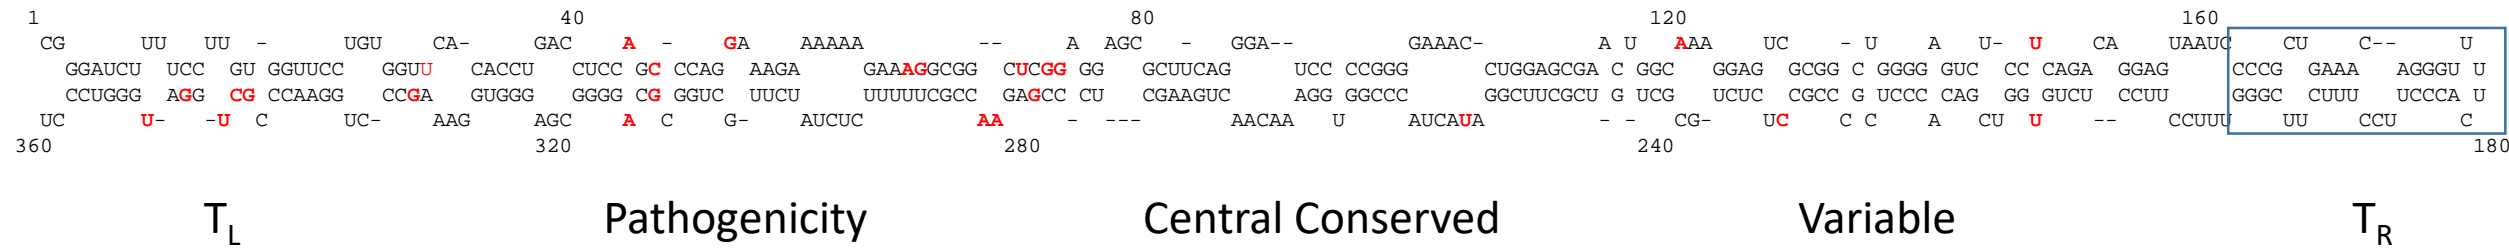

Supplement: s1 [file s1]
