# Supplementary material for: Pospiviroid Infection of Tomato Regulates the Expression of Genes Involved in Flower and Fruit Development
Source: MDPI journal article supplement (doi:10.3390/v10100516), 2018-09-21

**Supplementary Figure S2.** Description of components of the predicted network association of genes. Network nodes represent proteins, splice isoforms or post-transcriptional modifications; each node represents all the proteins produced by a single protein coding gene locus. Edges represent protein-protein associations; associations are specific and meaningful; proteins jointly contribute to a similar function, not necessarily meaning, they have physical bindings. Predictions were made using STRING <https://string-db.org> with gene ontology (GO) enrichment.

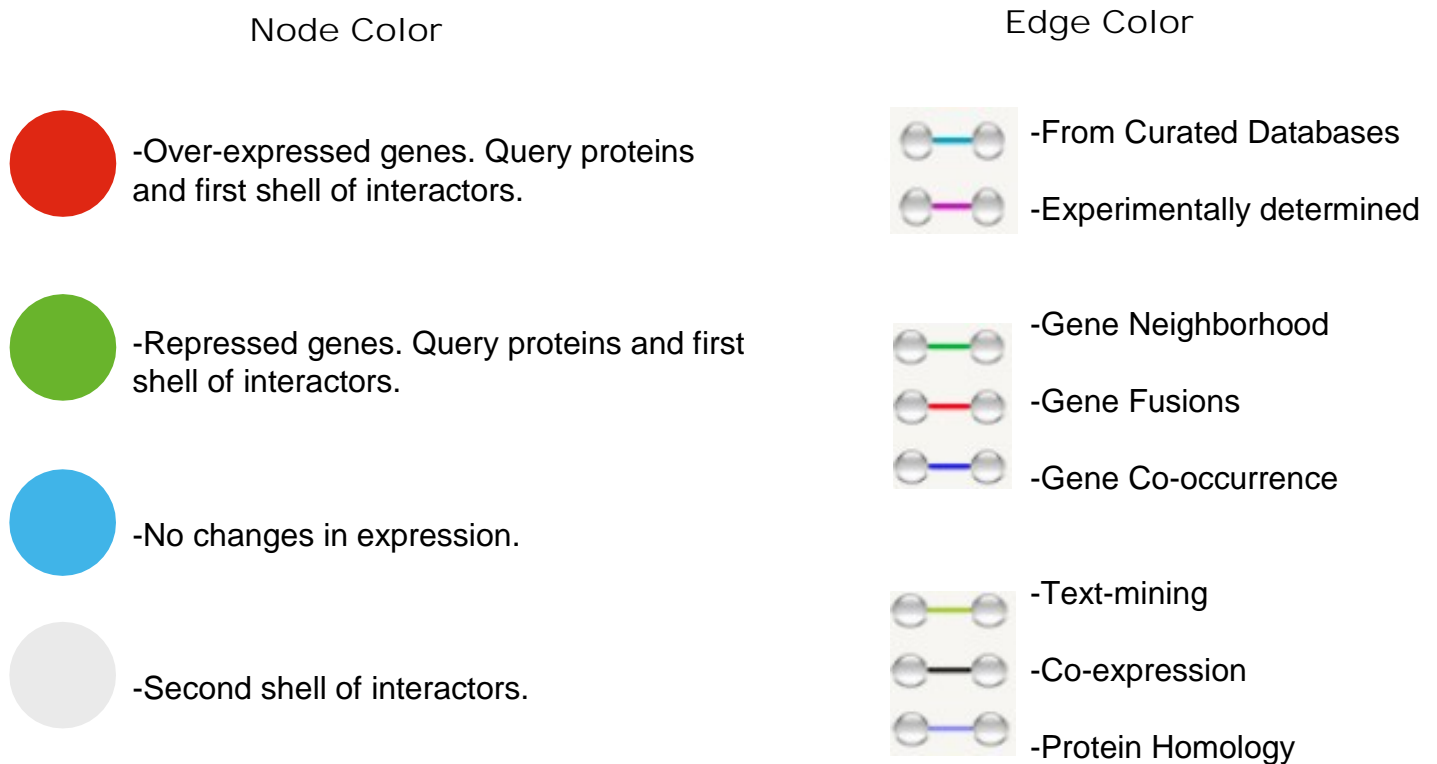

Current Organism

*Solanum lycopersicum*  
NCBI taxonomy Id: 4081

Other names: *Lycopersicon*, *Lycopersicon* (Mill.) Seithe, *Lycopersicon esculentum*, *Lycopersicon esculentum* Mill., *Lycopersicon esculentum* var. *esculentum*, *Lycopersicon lycopersicum*, *S. lycopersicum*, *Solanum esculentum*, *Solanum esculentum* Dunal, *Solanum lycopersicum*.



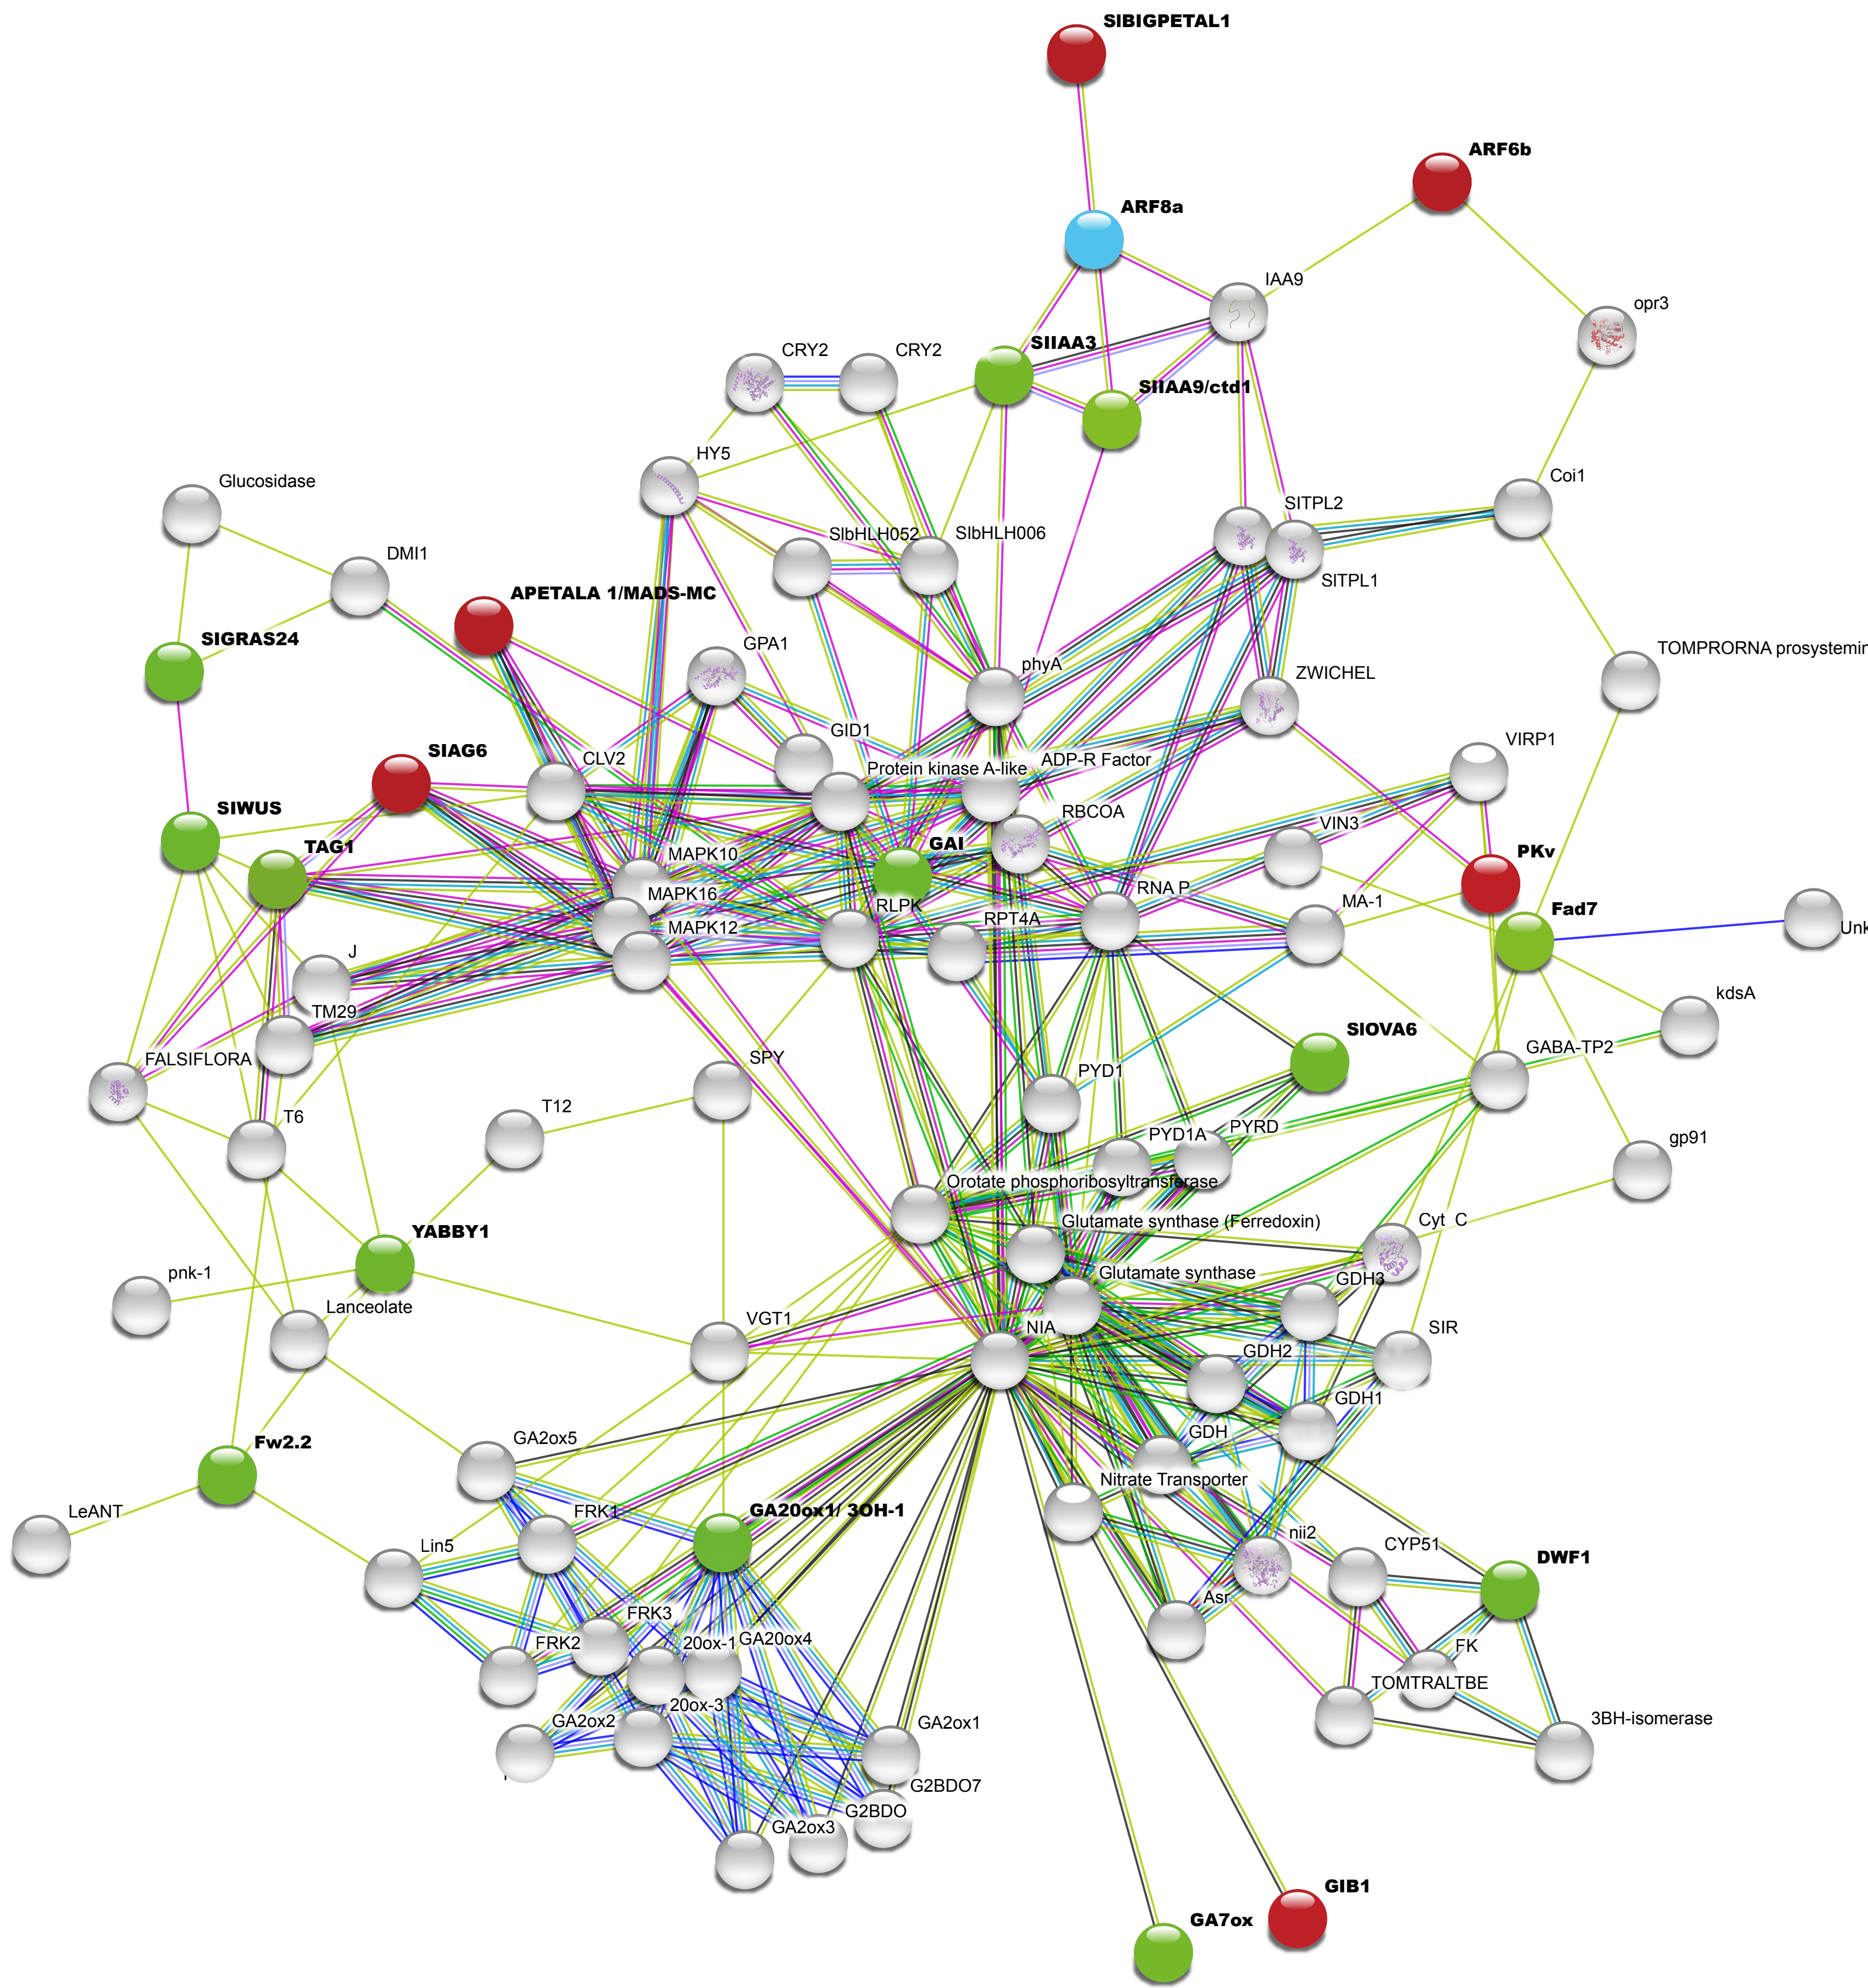

Supplement: s1 [file s1]
