# Supplementary material for: Pospiviroid Infection of Tomato Regulates the Expression of Genes Involved in Flower and Fruit Development
Source: Viruses. 2018 Sep 21;10(10):516. doi: 10.3390/v10100516 (PMC6213050; doi:10.3390/v10100516)
Supplement: Supplementary file 1 [file viruses-10-00516-s001.zip]

Archive with 4 entries (4 files):
- Supplementary Files/Supplementary Material Table S2 Avina-Padilla et al..pdf
- Supplementary Files/Supplementary Material-Figure S1 Avina-Padilla et al..pdf
- Supplementary Files/Supplementary Material-Figure S2 Avina-Padilla et al..pdf
- Supplementary Files/Supplementary Material-Table S1 Avina-Padilla et al..pdf
